# Supplementary material
Source: PubMed Central journal article supplement (PMC5215917)
Supplement: NIHMS70847-supplement-Supplementary_Information.pdf [file NIHMS70847-supplement-Supplementary_Information.pdf]

## **Supplementary Information**

### **Genetic code expansion in the mouse brain**

Russell J. Ernst<sup>1,2</sup>, Toke P. Krogager<sup>1,2</sup>, Elizabeth S. Maywood<sup>1</sup>, Roberto Zanchi<sup>1</sup>, Vaclav Beranek<sup>1</sup>, Thomas S. Elliott<sup>1</sup>, Nicholas P. Barry<sup>1</sup>, Michael H. Hastings<sup>1</sup>, Jason W. Chin<sup>1,3</sup>

<sup>1</sup>Medical Research Council Laboratory of Molecular Biology, Francis Crick Avenue, Cambridge, England, UK

<sup>2</sup>contributed equally to this work

<sup>3</sup>Correspondence: [chin@mrc-lmb.cam.ac.uk](mailto:chin@mrc-lmb.cam.ac.uk)

## Supplementary Results

## Supplementary Figures

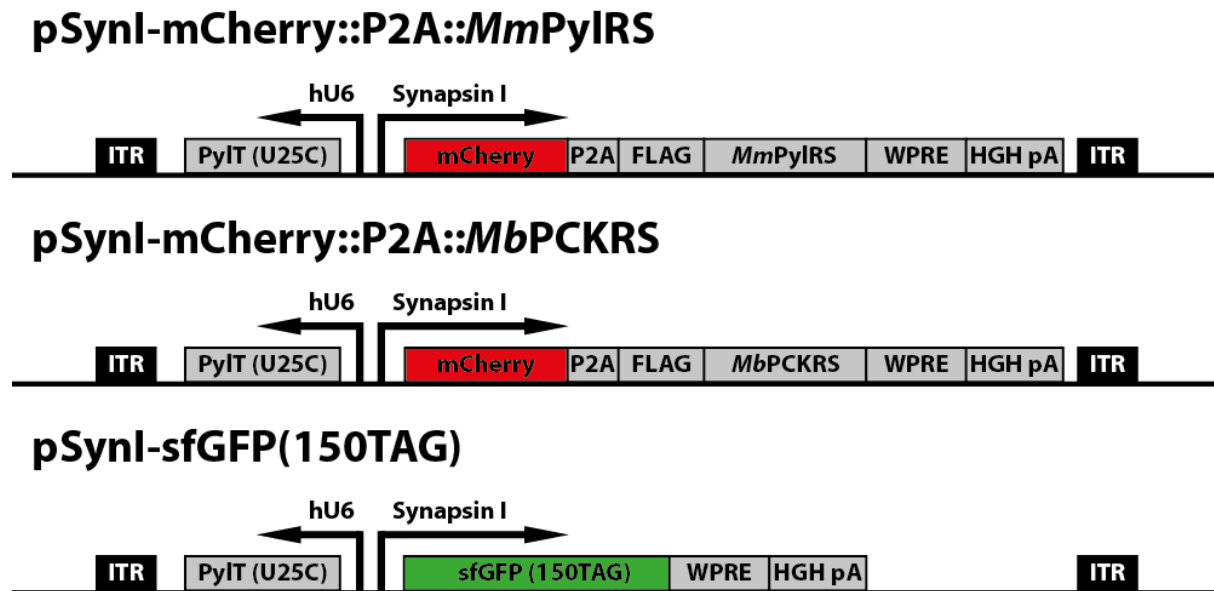

**Supplementary Figure 1. AAV Vectors.** Vectors for AAV mediated unnatural amino acid mutagenesis. ITR is Inverted Terminal Repeat, WPRE is Woodchuck Hepatitis Virus Post-transcriptional Regulatory Element, PyIT/PylRS are the genes encoding the pyrrolysyl tRNA/tRNA synthetase pair from *M. mazei*, P2A is the self-cleaving peptide sequence derived from porcine teschovirus-1, HGH pA is the Human Growth Hormone polyadenylation signal, hU6 is the human U6 RNA Pol III promoter, and Synapsin I is the human Synapsin I promoter.

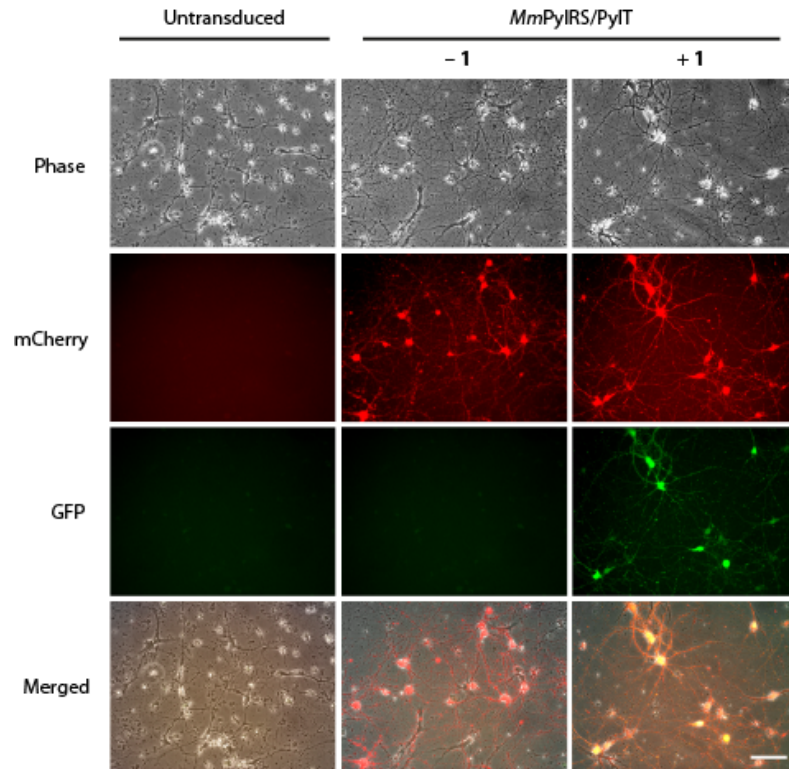

**Supplementary Figure 2. AAV-mediated incorporation of unnatural amino acids into proteins.** Unnatural amino acid incorporation in dissociated rat cortical neurons. Scale bar is 200  $\mu$ m.

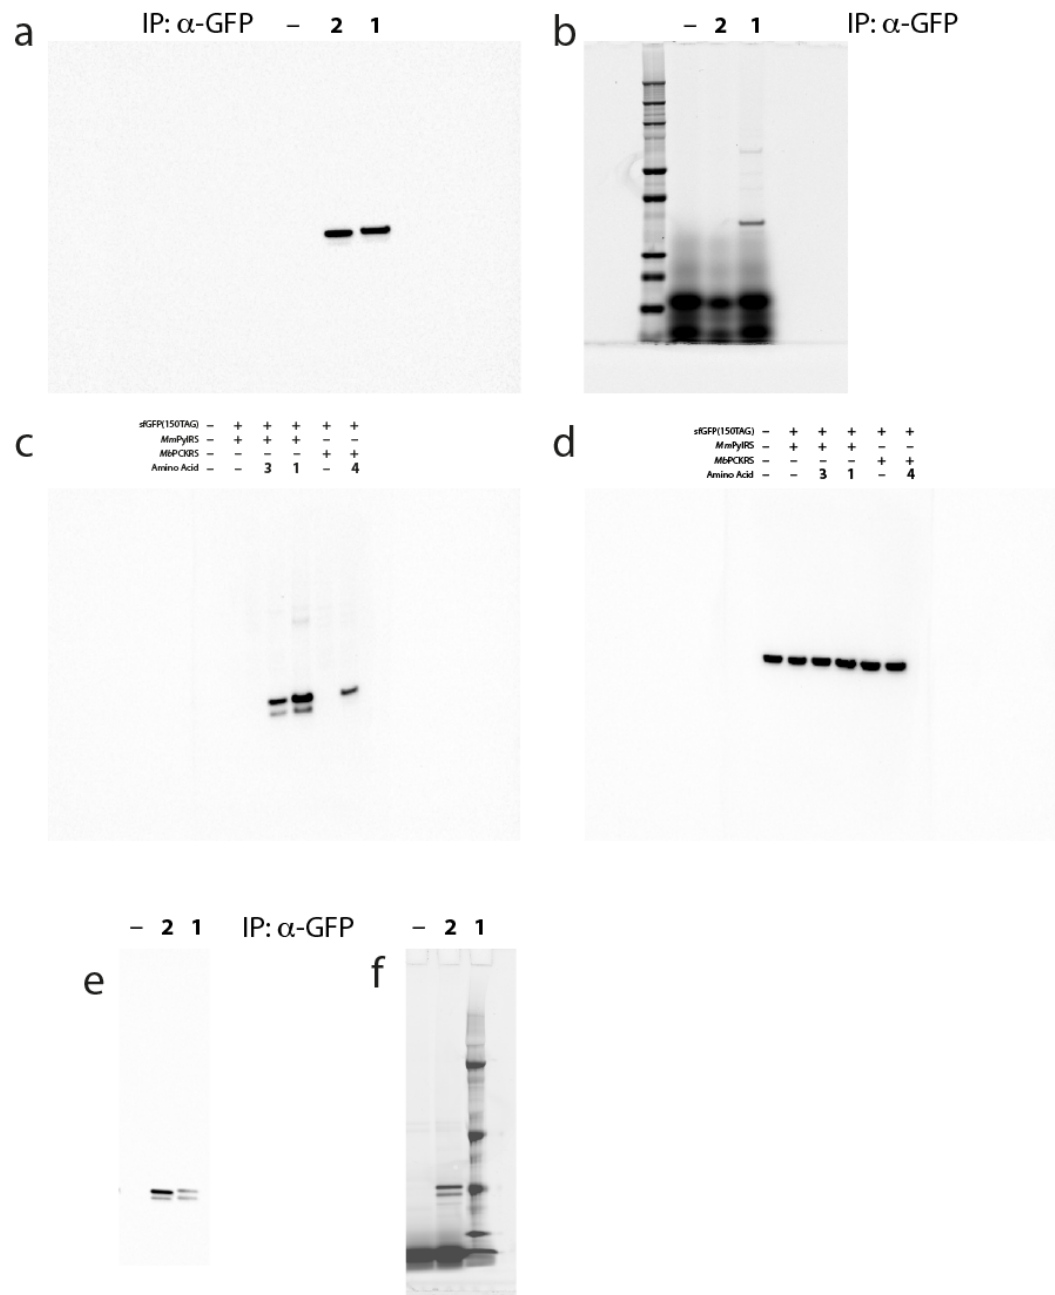

**Supplementary Figure 3. Full gel and membrane images for all figures. A.** Full membrane for anti-GFP WB from Figure 1C. **B.** Full fluorescence scan of gel from Figure 1C. **C.** Full membrane for anti-GFP WB from Figure 2B. **D.** Full membrane for anti-actin WB from Figure 2B. **E.** Full lanes for anti-GFP WB from Supplementary Figure 5C. **F.** Full lanes for fluorescence scan of gel from Supplementary Figure 5C.

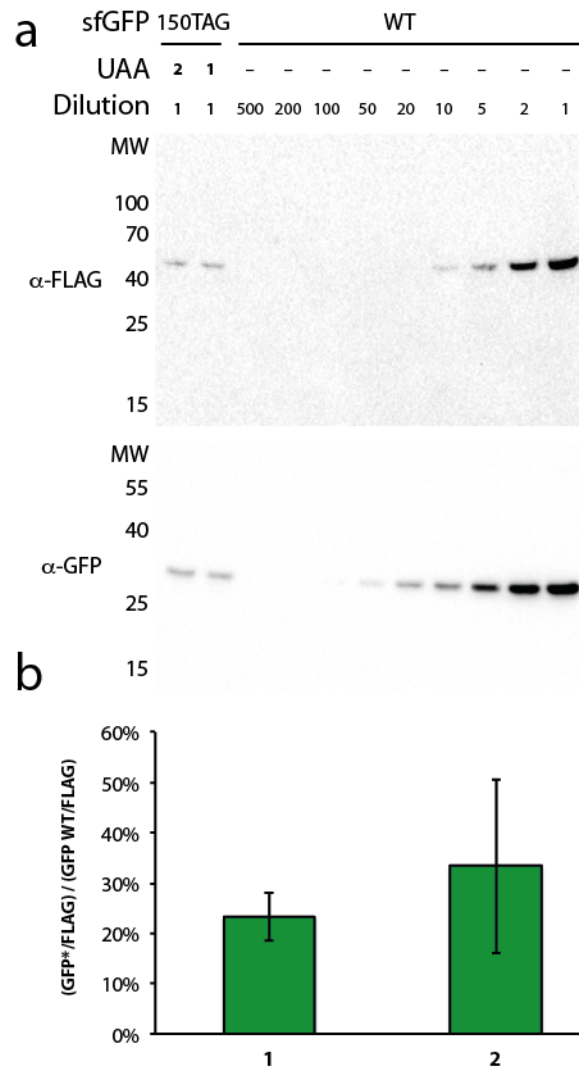

**Supplementary Figure 4. Efficiency of unnatural amino acid incorporation in dissociated rat cortical neurons. A.** Primary dissociated neurons from rat were transduced with a 1:1 mixture of the two AAV vectors encoding *MmPylRS/PylT* and sfGFP(150TAG) in conditioned media. Protein extracts were prepared from the cultures 8 d after transduction and 6 d after addition of 1 mM amino acid **1** or **2**. The extracts were analyzed by SDS-PAGE and immunoblot against GFP and the N-terminal FLAG epitope tag of *MmPylRS*. Expression in RCNs of sfGFP(150TAG) relative to the level of *MmPylRS*, (GFP\*/FLAG), was normalized to the expression in HEK293 of WT sfGFP relative to the level of *MmPylRS*, (GFP WT/FLAG). The WT dilution series was prepared from an arbitrary concentration of protein extracts of HEK293 cells transiently transfected with a 1:1 mixture of plasmids encoding WT sfGFP and *MmPylRS* under the AAV promoter, hSynI. **B.** The efficiencies of incorporation of amino acids **1** and **2** were determined to be 23.4% ± 4.8% and 33.3% ± 17.3%, respectively (n = 3, mean ± s.e.).

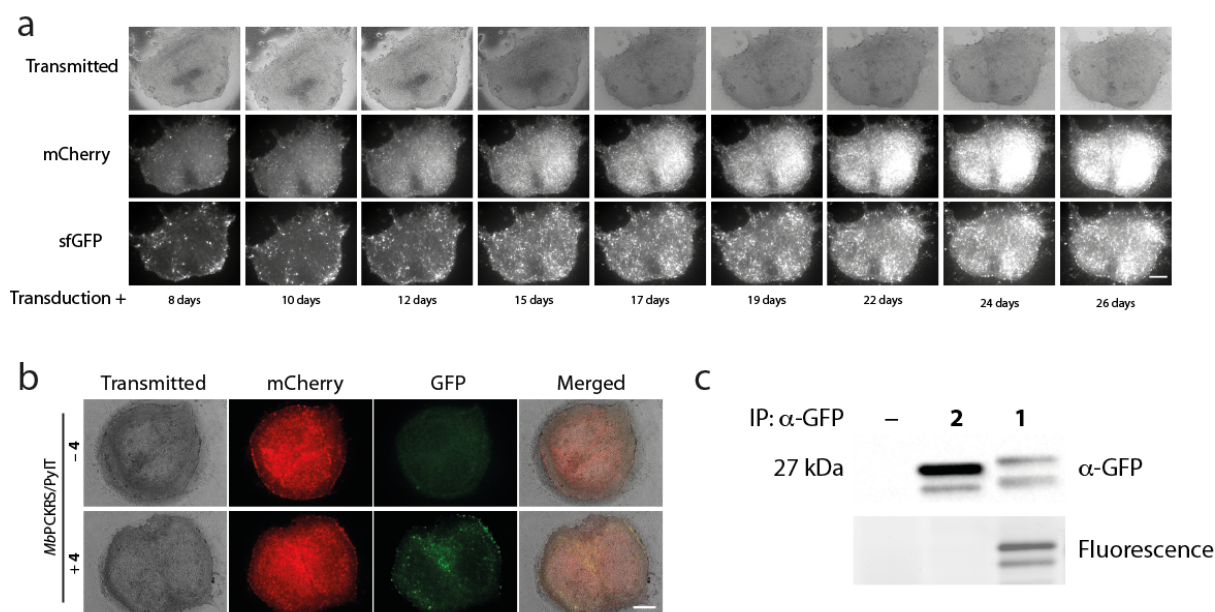

**Supplementary Figure 5. AAV-mediated genetic code expansion in SCN slices.** **A.** SCN slices were transduced with a 1:1 mixture of the two AAV vectors encoding *MmPylRS/PyIT* and sfGFP(150TAG). Times indicated are post transduction; at day 6, 1 mM amino acid **1** was added in fresh media, and the media containing **1** was replenished every seven days. Expression of mCherry and GFP continually increase over the duration of the experiment. Scale bar is 200  $\mu$ m. **B.** Unnatural amino acid **4** dependent expression of GFP in SCN slices demonstrates genetic code expansion in brain tissue. Scale bar is 200  $\mu$ m. **C.** Western blots confirm unnatural amino acid dependent production of sfGFP from sfGFP (150TAG). sfGFP incorporating **1**, but not **2**, is selectively labeled with **5** in an inverse electron demand Diels Alder reaction.

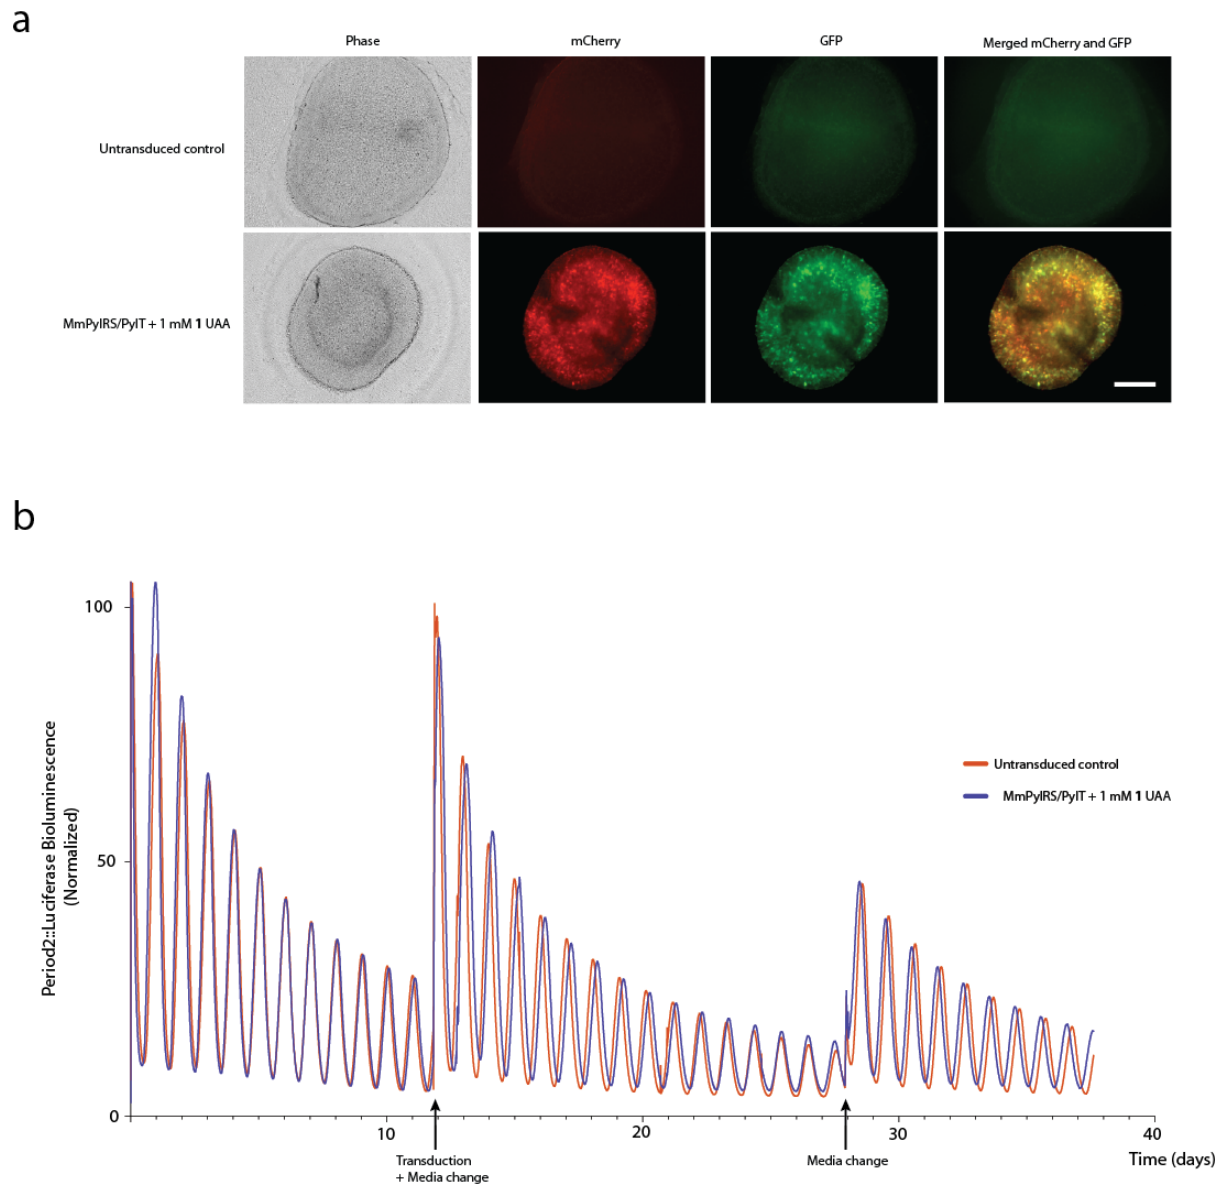

**Supplementary Figure 6. AAV-mediated genetic code expansion does not disrupt function of the SCN. A.** SCN slices were prepared from transgenic mice expressing a Period2:Luciferase fusion protein. AAV-mediated genetic code expansion results in sfGFP expression. Scale bar is 200  $\mu$ m. **B.** AAV-mediated genetic code expansion does not disrupt the oscillations of the neural circuitry of the SCN, as seen by bioluminescence assay.

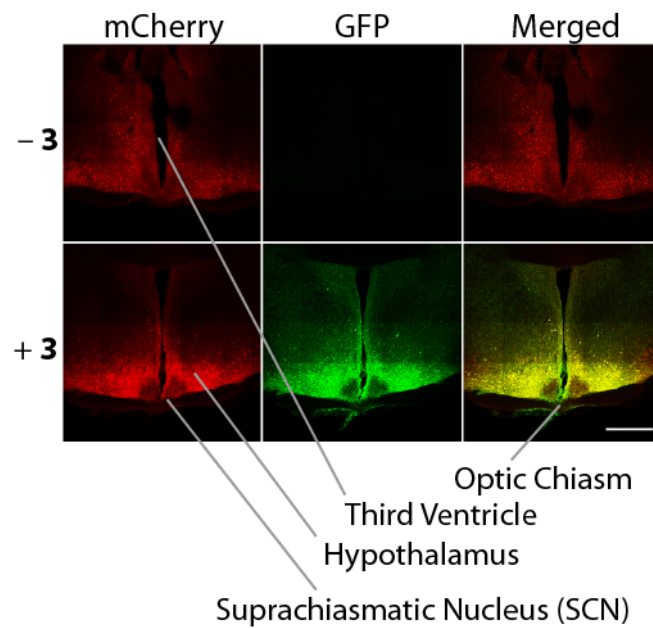

**Supplementary Figure 7. Incorporation of unnatural amino acids into proteins in live mice with anatomical detail indicated.** Unnatural amino acid dependent expression of GFP in coronal sections of the hypothalamus and SCN demonstrates genetic code expansion in the brains of live mice. Scale bar is 500  $\mu\text{m}$ .

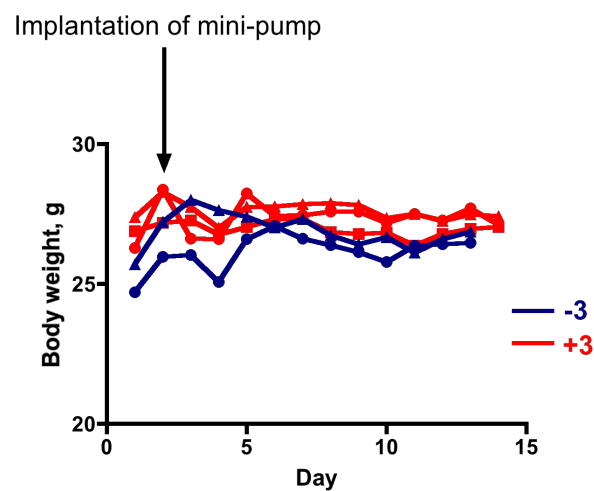

**Supplementary Figure 8. Body weights of mice.** Body weights of mice with or without continual perfusion of amino acid 3 into the region surrounding the hypothalamus and SCN were recorded daily throughout the two weeks perfusion period.

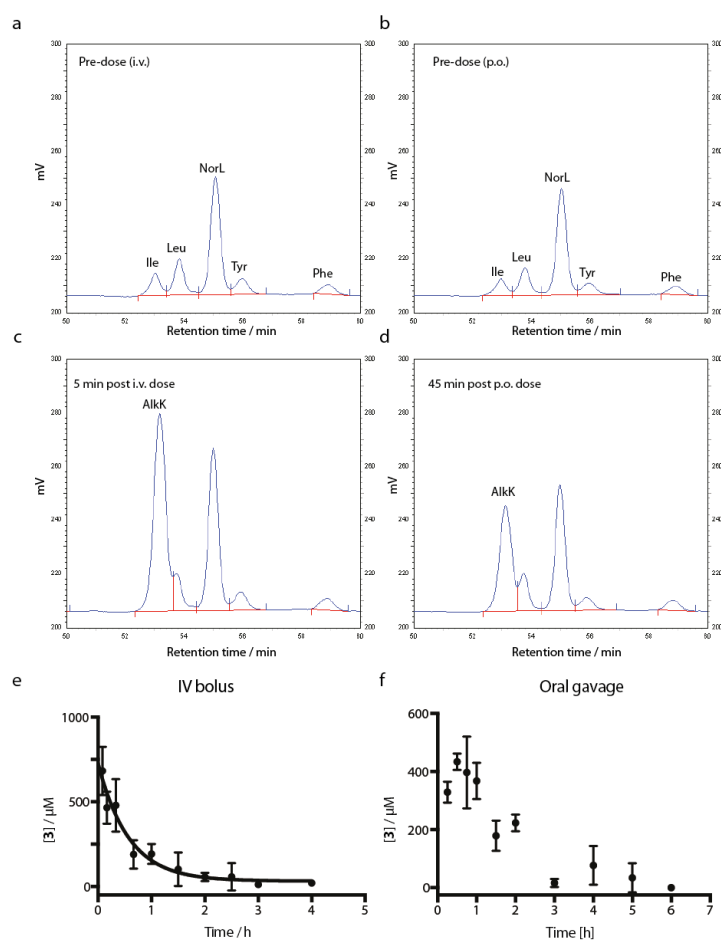

**Supplementary Figure 9. Pharmacokinetic Analysis.** Plasma amino acid analysis: in **A** and **B** the chromatograph of representative pre-dose plasma samples is shown. Following dosage with **3** additional area is observed (**C** and **D**). AlkK is amino acid **3**. Norleucine (NorL) was added as an internal standard to plasma samples. Estimation of pharmacokinetic parameters: time versus plasma concentration plots are shown for (**E**) intravenous (iv) bolus injection and (**F**) oral gavage. In **E** 100 mg/kg (380  $\mu\text{mol/kg}$ ) were administered by intra venous (iv) bolus injections in 3 cohorts of C57BL/6 mice. The observed  $\text{AUC}_{0-4}$  was  $503.9 \pm 53.2 \mu\text{M} \cdot \text{h}$ , from which we estimate iv clearance to be  $0.755 \text{ L/h} \cdot \text{kg}^{-1}$ , the non-compartmental half-life to be 0.612 h, and the volume of distribution at steady state to be  $0.667 \text{ L/kg}$ . In **F** 250 mg/kg ( $950 \mu\text{mol/kg}$ ) were administered by intra venous (iv) bolus injections in 3 cohorts of C57BL/6 mice. The observed  $\text{AUC}_{0-6}$  was  $811.8 \pm 69.1 \mu\text{M} \cdot \text{h}$ , from which we estimate po clearance to be  $1.17 \text{ L/h} \cdot \text{kg}^{-1}$ , the non-compartmental half-life to be 1.09 h, and the oral bioavailability to be 64%. Error bars represent the standard deviation.

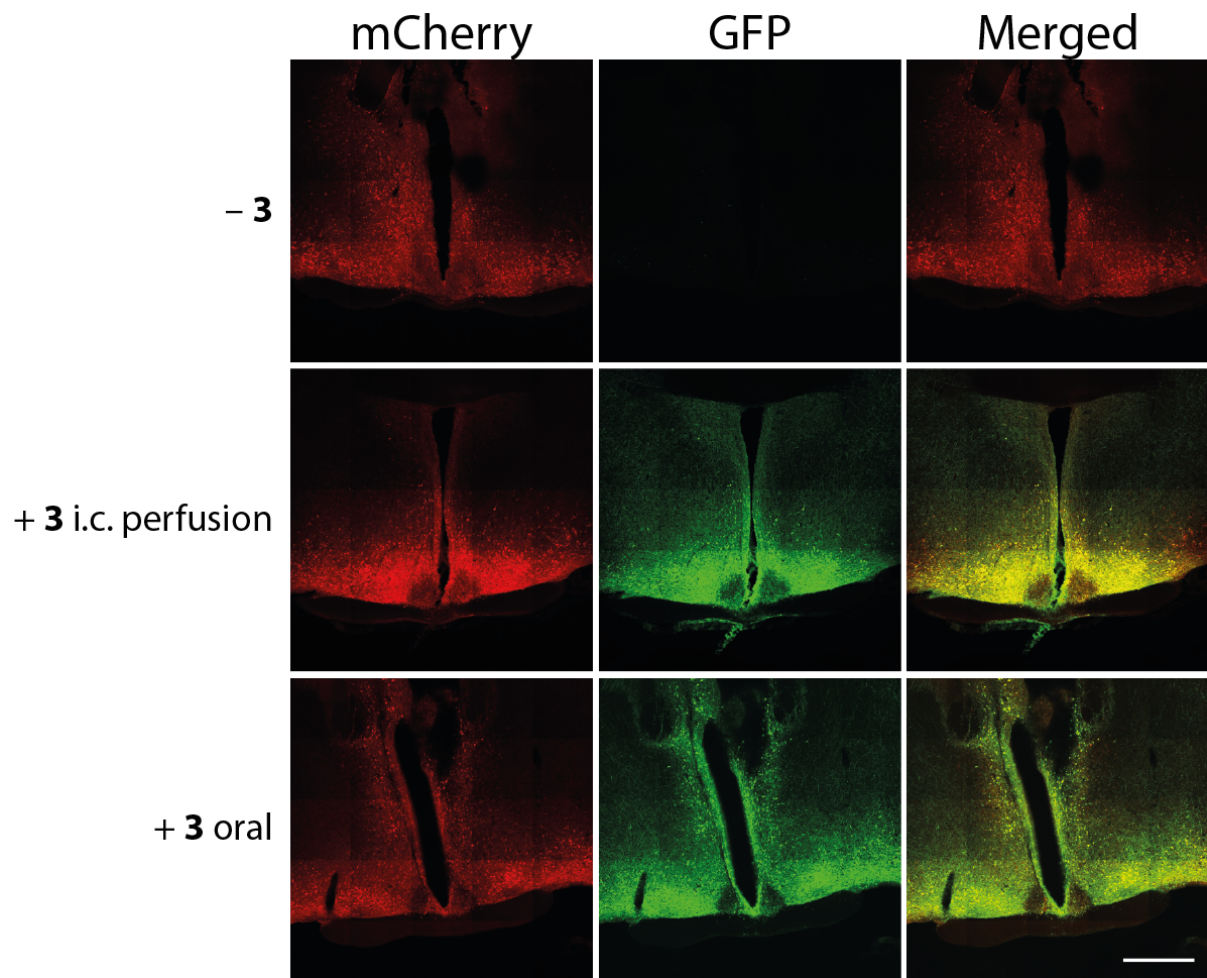

**Supplementary Figure 10. Incorporation of unnatural amino acids into proteins in the brains of live mice.** Unnatural amino acid dependent expression of GFP in coronal sections of the hypothalamus and SCN demonstrates genetic code expansion in the brains of live mice. Scale bar is 500  $\mu\text{m}$ . Amino acid **3** was delivered either through continuous intra-cranial perfusion (0.25  $\mu\text{L/hr}$ , 2 weeks) or through black currant-flavored water (30 mg/mL **3**).

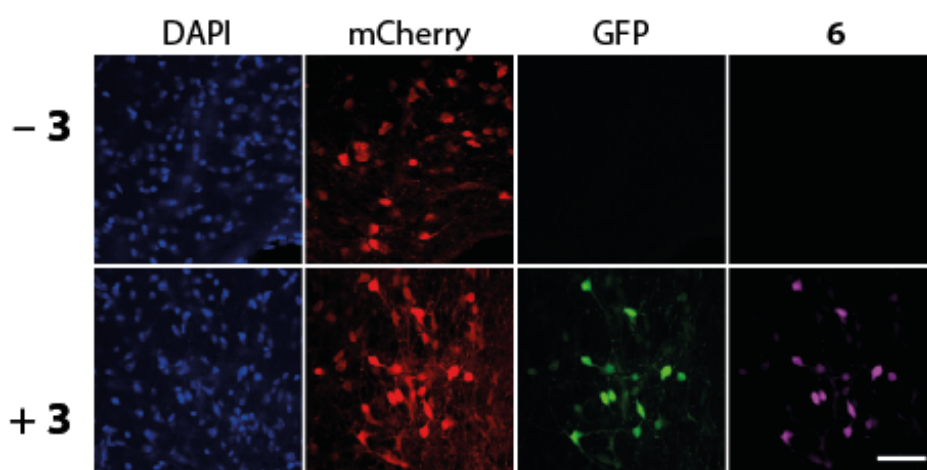

**Supplementary Figure 11. Incorporation of unnatural amino acids into live mice for bioorthogonal labeling.** Labeling of cells within a coronal section from mice expressing sfGFP containing **3** with azide-sulfo-Cy5 fluorophore (**6**), via a Cu (I) catalyzed cycloaddition. Scale bar is 20  $\mu\text{m}$ .

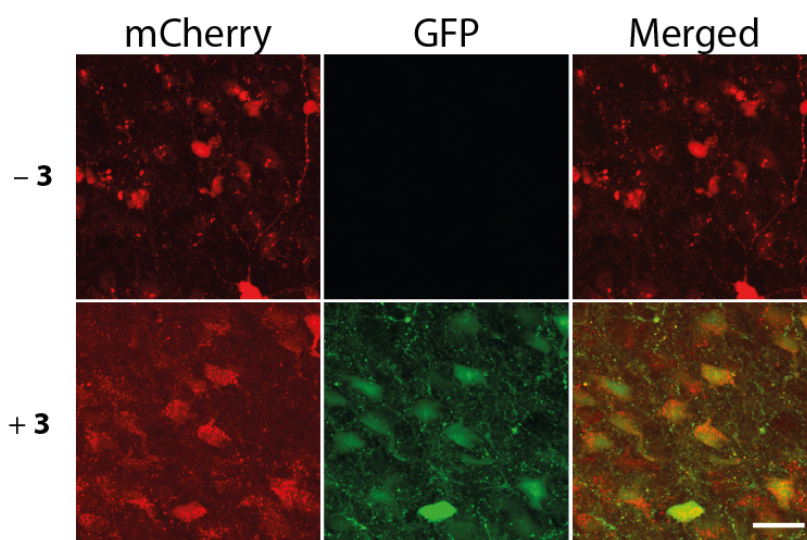

**Supplementary Figure 12. Maximal intensity projections of GFP fluorescence in the hippocampus.** Unnatural amino acid dependent expression of GFP in coronal sections of the hippocampus demonstrates genetic code expansion in the brains of live mice. Scale bar is 30  $\mu\text{m}$ . AAV particles were injected into the lateral ventricle. Two weeks after transduction, amino acid **3** was delivered through continuous intra-cranial perfusion (0.25  $\mu\text{L/hr}$ , 2 weeks). Images are maximal intensity projections of 30 optical sections taken at 1  $\mu\text{m}$  intervals.

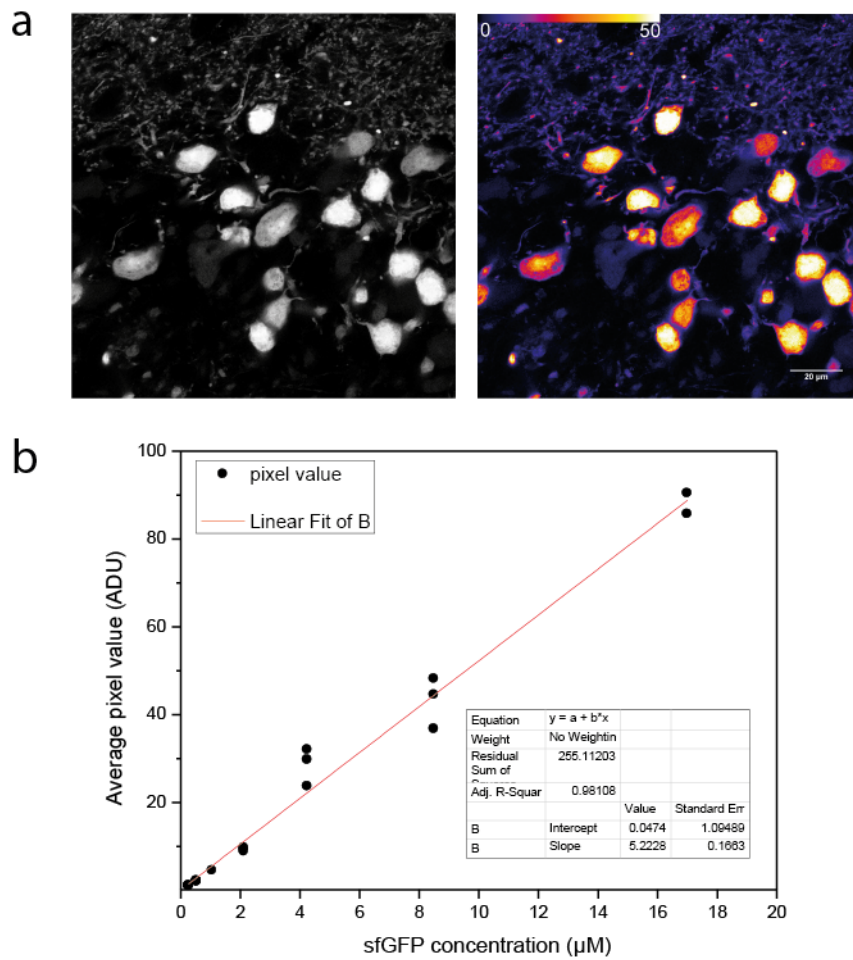

**Supplementary Figure 13. Direct quantification of GFP in the hippocampus via confocal microscopy. A.** Pixel intensity values of sfGFP expression in hippocampal sections map to GFP concentrations up to 50  $\mu\text{M}$ . **B.** Regression fit of average pixel values to sfGFP standard calibration curve. The heat map goes from 0 to 50  $\mu\text{M}$  and the scale bar is 20  $\mu\text{m}$ .
